# Supplementary material
Source: ML conference proceedings conference paper supplement (https://openreview.net/forum?id=ebBnKVxMcZ)

(a) All Samples: **Well-calibrated**

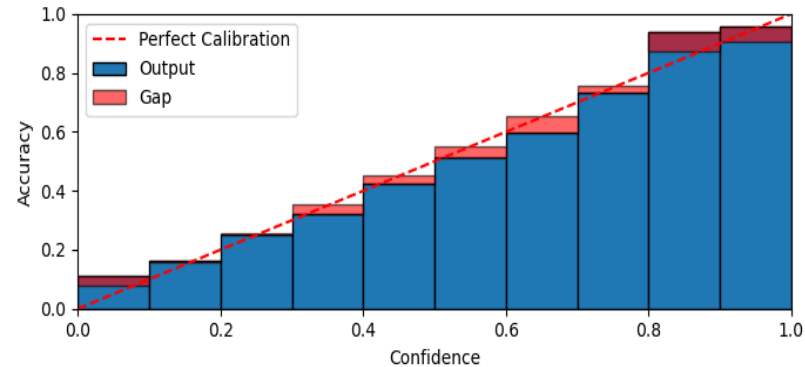

(b) High Proximity Samples: **Underconfident**

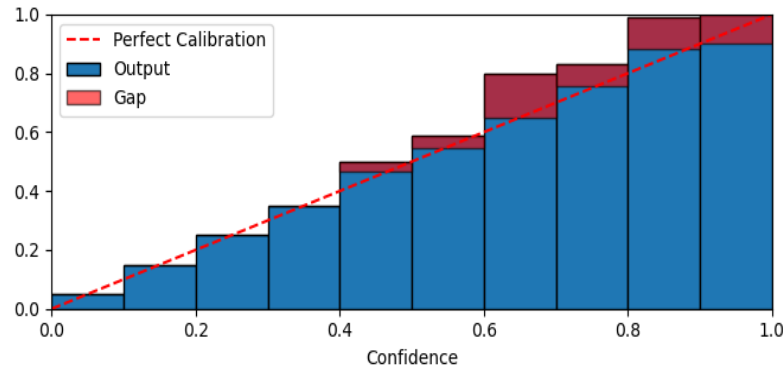

(c) Low Proximity Samples: **Overconfident**

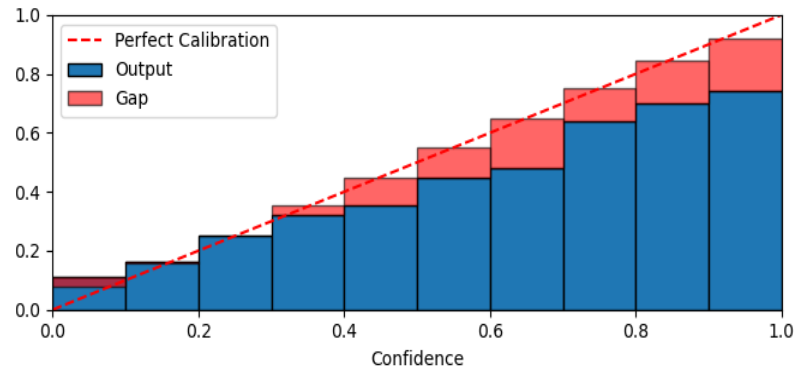

Supplement: supplementary_material [file attachment]
